# Supplementary figures and images for: Total serum vitamin B12 (cobalamin) LC-MS/MS assay as an arbiter of clinically discordant immunoassay results
Source: publisher site journal article supplement (doi:10.1515/cclm-2022-0523), 2022-09-14

**Supplementary information**


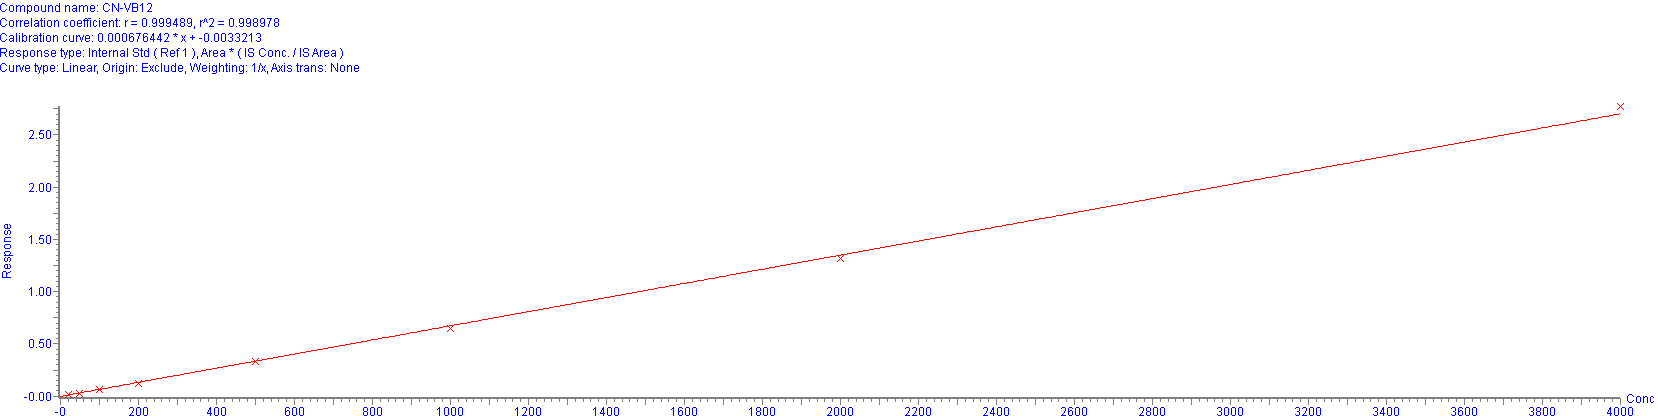


Supplemental Figure 1. Linearity of the LC-MS/MS method.

Supplement: Supplementary file 1 [file j_cclm-2022-0523_suppl.docx]
